# Supplementary material for: Phosphorylation of Arp2 is not essential for Arp2/3 complex activity in fission yeast
Source: Life Sci Alliance. 2018 Oct 29;1(5):e201800202. doi: 10.26508/lsa.201800202 (PMC6238581; doi:10.26508/lsa.201800202)
Supplement: Supplementary file 1 [file LSA-2018-00202_TableS1.xls]

## Sheet: Sheet1
Strain	Genotype	Source/Reference
FY527	h- ade6-M210 leu1-32 ura4-D18	Liang and Forsburg, 1999
FY528	h+ ade6-M216 leu1-32 ura4-D18	Liang and Forsburg, 1999
AE01	h- arp2-T233A:kanMX6 ade6-M21x leu1-32 ura4-D18	This study
AE02	h- arp2-T2334:kanMX6 ade6-M21x leu1-32 ura4-D18	This study
AE03	h- arp2-(T233A,T234A):kanMX6 ade6-M21x leu1-32 ura4-D18	This study
AE04	h- arp2-Y198F:kanMX6 ade6-M21x leu1-32 ura4-D18	This study
AE05	h- arp2-(Y198F,T233A):kanMX6 ade6-M21x leu1-32 ura4-D18	This study
AE06	h+ arp2-(Y198F,T234A):kanMX6 ade6-M21x leu1-32 ura4-D18	This study
AE07	h- arp2-(Y198F,T233A,T234A):kanMX6 ade6-M21x leu1-32 ura4-D18	This study
AE08	h+ arp2-T233D:kanMX6 ade6-M21x leu1-32 ura4-D18	This study
AE09	h- arp2-T234D:kanMX6 ade6-M21x leu1-32 ura4-D18	This study
AE11	h+ arp2-Y198E:kanMX6 ade6-M21x leu1-32 ura4-D18	This study
AE12	h+ arp2-(Y198E,T233D):kanMX6 ade6-M21x leu1-32 ura4-D18	This study
AE13	h+ arp2-(Y198E,T234D):kanMX6 ade6-M21x leu1-32 ura4-D18	This study
AE15	h? arp2-Y218F:kanMX6 ade6-M21x leu1-32 ura4-D18	This study
AE16	h? arp2-Y218E:kanMX6 ade6-M21x leu1-32 ura4-D18	This study
AE00D	h+/h- arp2-mEGFP:kanMX6/arp2 ade5-M210/ade6-M216 leu1-32 ura4-D18 (diploid)	This study
AE07D	h+/h- arp2-(Y198F,T233A,T234A)-mEGFP:kanMX6/arp2 ade5-M210/ade6-M216 leu1-32 ura4-D18 (diploid)	This study
AE10D	h+/h- arp2-(T233D,T234D)-mEGFP/arp2 ade5-M210/ade6-M216 leu1-32 ura4-D18 (diploid)	This study
AE18D	h+/h- ade5-M210/ade6-M216 leu1-32 ura4-D18 (diploid)	This study
AE00F	h+ fim1-mEGFP:kanMX6 ade6-M21x leu1-32 ura4-D18	Sirotkin et al., 2010
AE03F	h? arp2-(T233A,T234A):kanMX6 fim1-mEGFP:kanMX6 ade6-M21x leu1-32 ura4-D18	This study
AE07F	h? arp2-(Y198F,T233A,T234A):kanMX6 fim1-mEGFP:kanMX6 ade6-M21x leu1-32 ura4-D18	This study
AE08F	h? arp2-T233D:kanMX6 fim1-mEGFP:kanMX6 ade6-M21x leu1-32 ura4-D18	This study
AE09F	h? arp2-T234D:kanMX6 fim1-mEGFP:kanMX6 ade6-M21x leu1-32 ura4-D18	This study
AE12F	h? arp2-T233A:kanMX6 fim1-mEGFP:kanMX6 ade6-M21x leu1-32 ufra4-D18	This study
AE15F	h? arp2-Y198F:kanMX6 fim1-mEGFP:kanMX6 ade6-M21x leu1-32 ura4-D18	This study
AE16F	h? arp2-Y198E:kanMX6 fim1-mEGFP:kanMX6 ade6-M21x leu1-32 ura4-D18	This study
AE20	h+ ain1-mEGFP:kanMX6 ade6-M216 leu1-32 ura4-D18	Sirotkin et al., 2010
AE21	h+ kanMX6:Pmyo2-mEGFP-myo2 ade6-M216 leu1-32 ura4-D18	Sirotkin et al., 2010
AE22	h- acp2-mEGFP:kanMX6 ade6-M210 leu1-32 ura4-D18	Sirotkin et al., 2010
AE23	h- arc5-mEGFP:kanMX6 ade6-M210 leu1-32 ura4-D18	Sirotkin et al., 2010
AE24	h- arp2-mEGFP:kanMX6 ade6-M210 leu1-32 ura4-D18	Sirotkin et al., 2010
AE25	h- arp3-mEGFP:kanMX6 ade6-M210 leu1-32 ura4-D18	Sirotkin et al., 2010
