# Supplementary material for: Phosphorylation of Arp2 is not essential for Arp2/3 complex activity in fission yeast
Source: Life Sci Alliance. 2018 Oct 29;1(5):e201800202. doi: 10.26508/lsa.201800202 (PMC6238581; doi:10.26508/lsa.201800202)
Supplement: Supplementary file 6 [file LSA-2018-00202_SdataF5.xlsx]

## Sheet: Sheet1
WT (FY528)					AE07
Elution Volume	280 nm absorbance	Elution Volume	Conductivity		Elution Volume	280 nm absorbance	Elution Volume	Conductivity
ml	mAU	ml	mS/cm		ml	mAU	ml	mS/cm
72.3386	21.099	72.3413	65.61		68.7685	5.076	68.7716	5.3
72.3813	0.424	72.385	6.09		68.8337	1.845	68.8406	5.42
72.4239	0.361	72.4286	6.09		68.899	1.856	68.9096	5.42
72.4666	0.338	72.4723	6.08		68.9642	1.884	68.9786	5.41
72.5093	0.399	72.5159	6.08		69.0294	1.867	69.0476	5.41
72.552	0.365	72.5596	6.08		69.0947	1.891	69.1166	5.4
72.5946	0.411	72.6032	6.07		69.1599	1.897	69.1856	5.4
72.6373	0.408	72.6469	6.07		69.2251	2.261	69.2546	5.4
72.68	0.385	72.6905	6.07		69.2904	1.855	69.3236	5.4
72.7226	0.404	72.7342	6.07		69.3556	1.886	69.3926	5.39
72.7653	0.407	72.7778	6.06		69.4208	1.825	69.4616	5.39
72.808	0.379	72.8215	6.06		69.4861	1.909	69.5306	5.39
72.8507	0.391	72.8651	6.06		69.5513	1.831	69.5996	5.39
72.8933	0.368	72.9088	6.06		69.6166	1.904	69.6686	5.38
72.936	0.404	72.9524	6.06		69.6818	1.888	69.7376	5.38
72.9787	0.435	72.9961	6.05		69.747	1.855	69.8066	5.38
73.0214	0.417	73.0397	6.05		69.8123	1.896	69.8756	5.38
73.064	0.457	73.0834	6.05		69.8775	1.849	69.9446	5.37
73.1067	0.477	73.127	6.05		69.9427	1.863	70.0137	5.37
73.1494	0.42	73.1707	6.05		70.008	1.856	70.0827	5.37
73.1921	0.457	73.2143	6.05		70.0732	1.895	70.1517	5.37
73.2347	0.437	73.258	6.04		70.1384	1.878	70.2207	5.36
73.2774	0.439	73.3016	6.04		70.2037	1.873	70.2897	5.36
73.3201	0.465	73.3453	6.04		70.2689	1.875	70.3587	5.35
73.3627	0.432	73.3889	6.04		70.3341	1.853	70.4277	5.35
73.4054	0.396	73.4326	6.04		70.3994	1.876	70.4967	5.34
73.4481	0.419	73.4762	6.04		70.4646	1.882	70.5657	5.34
73.4908	0.376	73.5199	6.04		70.5299	1.88	70.6347	5.33
73.5334	0.473	73.5635	6.03		70.5951	1.855	70.7037	5.32
73.5761	0.353	73.6072	6.03		70.6603	1.916	70.7727	5.32
73.6188	0.386	73.6508	6.03		70.7256	1.889	70.8417	5.31
73.6615	0.442	73.6945	6.03		70.7908	1.818	70.9107	5.31
73.7041	0.425	73.7381	6.02		70.856	1.825	70.9797	5.3
73.7468	0.432	73.7818	6.02		70.9213	1.864	71.0487	5.29
73.7895	0.441	73.8254	6.02		70.9865	1.85	71.1177	5.3
73.8321	0.458	73.8691	6.01		71.0517	1.866	71.1867	5.29
73.8748	0.407	73.9127	6.01		71.117	0.006	71.2557	5.29
73.9175	0.38	73.9564	6.01		71.1822	0.026	71.3247	5.28
73.9602	0.357	74	6		71.2474	0.164	71.3937	5.33
74.0028	0.347	74.0437	6		71.3127	1.15	71.4627	4.91
74.0455	0.367	74.0873	5.99		71.3779	0.861	71.5317	5.23
74.0882	0.374	74.131	5.99		71.4432	0.534	71.6007	5.21
74.1309	0.388	74.1746	5.98		71.5084	0.372	71.6697	5.21
74.1735	0.388	74.2183	5.98		71.5736	0.095	71.7387	5.2
74.2162	0.386	74.2619	5.98		71.6389	-0.029	71.8077	5.19
74.2589	0.398	74.3056	5.97		71.7041	-0.269	71.8768	5.18
74.3016	0.373	74.3492	5.97		71.7693	-0.411	71.9458	5.18
74.3442	0.4	74.3929	5.96		71.8346	-0.57	72.0148	5.17
74.3869	0.4	74.4365	5.96		71.8998	-0.712	72.0838	5.17
74.4296	0.385	74.4801	5.96		71.965	-0.8	72.1528	5.17
74.4722	0.377	74.5238	5.96		72.0303	-0.87	72.2218	5.16
74.5149	0.384	74.5674	5.95		72.0955	-0.812	72.2908	5.16
74.5576	0.414	74.6111	5.95		72.1607	-0.889	72.3598	5.17
74.6003	0.36	74.6547	5.95		72.226	-0.754	72.4288	5.18
74.6429	0.059	74.6984	5.95		72.2912	-0.568	72.4978	5.19
74.6856	0.037	74.742	5.95		72.3565	-0.462	72.5668	5.2
74.7283	0.056	74.7857	5.95		72.4217	-0.439	72.6358	5.2
74.771	0.233	74.8293	5.94		72.4869	-0.4	72.7048	5.2
74.8136	0.349	74.873	5.93		72.5522	-0.373	72.7738	5.21
74.8563	11.385	74.9166	5.93		72.6174	-0.447	72.8428	5.21
74.899	13.205	74.9603	5.92		72.6826	-0.433	72.9118	5.2
74.9416	13.321	75.0039	5.93		72.7479	-0.378	72.9808	5.2
74.9843	13.211	75.0476	5.69		72.8131	-0.429	73.0498	5.2
75.027	13.026	75.0912	6.16		72.8783	-0.484	73.1188	5.2
75.0697	12.89	75.1349	6.16		72.9436	-0.543	73.1878	5.2
75.1123	12.724	75.1785	6.16		73.0088	-0.552	73.2568	5.21
75.155	12.518	75.2222	6.16		73.074	-0.684	73.3258	5.21
75.1977	12.323	75.2658	6.16		73.1393	-0.828	73.3948	5.21
75.2404	12.186	75.3095	6.15		73.2045	-0.951	73.4638	5.21
75.283	12.079	75.3531	6.15		73.2698	-1.043	73.5328	5.22
75.3257	11.947	75.3968	6.14		73.335	-1.222	73.6018	5.22
75.3684	11.74	75.4404	6.14		73.4002	-1.363	73.6708	5.22
75.411	11.607	75.4841	6.13		73.4655	-1.471	73.7399	5.22
75.4537	11.468	75.5277	6.13		73.5307	-1.608	73.8089	5.22
75.4964	11.333	75.5714	6.12		73.5959	-1.692	73.8779	5.22
75.5391	11.203	75.615	6.11		73.6612	-1.8	73.9469	5.23
75.5817	11.055	75.6587	6.11		73.7264	-1.848	74.0159	5.23
75.6244	10.973	75.7023	6.11		73.7916	-1.992	74.0849	5.23
75.6671	10.833	75.746	6.1		73.8569	-2.074	74.1539	5.23
75.7098	10.794	75.7896	6.1		73.9221	-2.14	74.2229	5.23
75.7524	11.236	75.8333	6.1		73.9873	-2.195	74.2919	5.23
75.7951	11.631	75.8769	6.11		74.0526	-2.291	74.3609	5.23
75.8378	11.801	75.9206	6.13		74.1178	-2.35	74.4299	5.23
75.8805	11.957	75.9642	6.15		74.1831	-2.404	74.4989	5.23
75.9231	11.897	76.0079	6.17		74.2483	-2.418	74.5679	5.23
75.9658	11.853	76.0515	6.2		74.3135	-2.521	74.6369	5.23
76.0085	11.714	76.0952	6.22		74.3788	-2.504	74.7059	5.23
76.0511	11.524	76.1388	6.23		74.444	-2.586	74.7749	5.23
76.0938	11.289	76.1825	6.24		74.5092	-2.655	74.8439	5.23
76.1365	11.109	76.2261	6.25		74.5745	-2.684	74.9129	5.23
76.1792	10.922	76.2698	6.26		74.6397	-2.694	74.9819	5.23
76.2218	10.81	76.3134	6.26		74.7049	-2.683	75.0509	5.23
76.2645	10.83	76.3571	6.26		74.7702	-2.725	75.1199	5.23
76.3072	10.939	76.4007	6.25		74.8354	-2.792	75.1889	5.23
76.3499	11.159	76.4444	6.25		74.9006	-2.798	75.2579	5.23
76.3925	11.518	76.488	6.23		74.9659	-2.934	75.3269	5.24
76.4352	11.838	76.5317	6.22		75.0311	-2.972	75.3959	5.24
76.4779	12.059	76.5753	6.21		75.0964	-3.015	75.4649	5.24
76.5205	12.267	76.619	6.19		75.1616	-3.101	75.5339	5.24
76.5632	12.409	76.6626	6.17		75.2268	-3.114	75.603	5.24
76.6059	12.475	76.7063	6.15		75.2921	-3.172	75.672	5.24
76.6486	12.502	76.7499	6.13		75.3573	-3.17	75.741	5.24
76.6912	12.471	76.7936	6.11		75.4225	-3.245	75.81	5.25
76.7339	12.467	76.8372	6.09		75.4878	-3.177	75.879	5.25
76.7766	12.421	76.8809	6.07		75.553	-3.192	75.948	5.25
76.8193	12.335	76.9245	6.06		75.6182	-3.17	76.017	5.26
76.8619	12.335	76.9682	6.04		75.6835	-3.1	76.086	5.26
76.9046	12.263	77.0118	6.02		75.7487	-3.043	76.155	5.27
76.9473	12.224	77.0555	6.01		75.8139	-3.051	76.224	5.27
76.99	12.128	77.0991	6		75.8792	-3.031	76.293	5.28
77.0326	12.042	77.1428	5.99		75.9444	-2.927	76.362	5.29
77.0753	11.972	77.1864	5.98		76.0097	-2.851	76.431	5.3
77.118	11.885	77.2301	5.97		76.0749	-2.779	76.5	5.31
77.1606	11.81	77.2737	5.97		76.1401	-2.631	76.569	5.32
77.2033	11.752	77.3173	5.97		76.2054	-2.509	76.638	5.34
77.246	11.585	77.361	5.97		76.2706	-2.337	76.707	5.35
77.2887	11.538	77.4046	5.96		76.3358	-2.188	76.776	5.36
77.3313	11.404	77.4483	5.96		76.4011	-1.988	76.845	5.38
77.374	11.277	77.4919	5.96		76.4663	-1.837	76.914	5.4
77.4167	11.083	77.5356	5.96		76.5315	-1.58	76.983	5.42
77.4594	10.892	77.5792	5.96		76.5968	-1.384	77.052	5.43
77.502	10.616	77.6229	5.96		76.662	-1.148	77.121	5.45
77.5447	10.31	77.6665	5.96		76.7272	-0.951	77.19	5.47
77.5874	9.944	77.7102	5.96		76.7925	-0.708	77.259	5.49
77.63	9.515	77.7538	5.97		76.8577	-0.485	77.328	5.51
77.6727	9.156	77.7975	5.97		76.923	-0.251	77.397	5.53
77.7154	8.824	77.8411	5.97		76.9882	-0.064	77.4661	5.55
77.7581	8.459	77.8848	5.97		77.0534	-1.408	77.5351	5.57
77.8007	8.157	77.9284	5.97		77.1187	-0.543	77.6041	5.59
77.8434	7.946	77.9721	5.98		77.1839	-1.009	77.6731	5.61
77.8861	7.747	78.0157	5.98		77.2491	-0.681	77.7421	5.63
77.9288	7.552	78.0594	5.98		77.3144	-0.463	77.8111	5.65
77.9714	7.434	78.103	5.98		77.3796	-0.233	77.8801	5.67
78.0141	7.325	78.1467	5.99		77.4448	0.016	77.9491	5.69
78.0568	7.21	78.1903	5.99		77.5101	0.235	78.0181	5.71
78.0995	7.168	78.234	5.99		77.5753	0.467	78.0871	5.73
78.1421	7.071	78.2776	6		77.6405	0.732	78.1561	5.75
78.1848	7.033	78.3213	6		77.7058	0.987	78.2251	5.76
78.2275	6.996	78.3649	6		77.771	1.264	78.2941	5.78
78.2701	6.885	78.4086	6		77.8363	1.566	78.3631	5.8
78.3128	6.833	78.4522	6		77.9015	1.848	78.4321	5.81
78.3555	6.782	78.4959	6		77.9667	2.197	78.5011	5.83
78.3982	6.68	78.5395	6		78.032	2.529	78.5701	5.85
78.4408	6.559	78.5832	6		78.0972	2.9	78.6391	5.87
78.4835	6.458	78.6268	6		78.1624	3.262	78.7081	5.89
78.5262	6.397	78.6705	6		78.2277	3.582	78.7771	5.9
78.5689	6.268	78.7141	6		78.2929	3.89	78.8461	5.92
78.6115	6.144	78.7578	6.01		78.3581	4.166	78.9151	5.94
78.6542	6.033	78.8014	6.01		78.4234	4.404	78.9841	5.96
78.6969	5.927	78.8451	6.01		78.4886	4.61	79.0531	5.98
78.7395	5.829	78.8887	6.01		78.5539	4.835	79.1221	6
78.7822	5.779	78.9324	6.01		78.6191	4.921	79.1911	6.02
78.8249	5.647	78.976	6.02		78.6843	5.092	79.2601	6.05
78.8676	5.514	79.0197	6.02		78.7496	5.201	79.3292	6.07
78.9102	5.388	79.0633	6.02		78.8148	5.388	79.3982	6.1
78.9529	5.252	79.107	6.02		78.88	5.59	79.4672	6.12
78.9956	5.143	79.1506	6.03		78.9453	5.784	79.5362	6.14
79.0383	5.031	79.1943	6.03		79.0105	6.006	79.6052	6.16
79.0809	4.916	79.2379	6.03		79.0757	6.241	79.6742	6.19
79.1236	4.824	79.2816	6.04		79.141	6.47	79.7432	6.22
79.1663	4.687	79.3252	6.04		79.2062	6.71	79.8122	6.24
79.209	4.553	79.3689	6.04		79.2714	7.045	79.8812	6.26
79.2516	4.443	79.4125	6.05		79.3367	7.236	79.9502	6.29
79.2943	4.337	79.4562	6.05		79.4019	7.535	80.0192	6.31
79.337	4.211	79.4998	6.06		79.4672	7.801	80.0882	6.34
79.3796	4.145	79.5435	6.06		79.5324	8.132	80.1572	6.36
79.4223	3.974	79.5871	6.07		79.5976	8.42	80.2262	6.38
79.465	3.85	79.6308	6.07		79.6629	8.711	80.2952	6.4
79.5077	3.847	79.6744	6.08		79.7281	9.011	80.3642	6.43
79.5503	3.724	79.7181	6.09		79.7933	9.322	80.4332	6.45
79.593	3.667	79.7617	6.09		79.8586	9.546	80.5022	6.47
79.6357	3.687	79.8054	6.1		79.9238	9.826	80.5712	6.5
79.6784	3.672	79.849	6.11		79.989	10.134	80.6402	6.52
79.721	3.707	79.8927	6.11		80.0543	10.423	80.7092	6.55
79.7637	3.777	79.9363	6.12		80.1195	10.769	80.7782	6.57
79.8064	3.83	79.98	6.13		80.1847	11.04	80.8472	6.6
79.849	3.922	80.0236	6.14		80.25	11.301	80.9162	6.61
79.8917	4.01	80.0673	6.15		80.3152	11.683	80.9852	6.64
79.9344	4.074	80.1109	6.16		80.3805	11.975	81.0542	6.66
79.9771	4.195	80.1545	6.17		80.4457	12.291	81.1232	6.69
80.0197	4.287	80.1982	6.18		80.5109	12.563	81.1923	6.71
80.0624	4.39	80.2418	6.19		80.5762	12.871	81.2613	6.73
80.1051	4.5	80.2855	6.2		80.6414	13.199	81.3303	6.76
80.1478	4.613	80.3291	6.21		80.7066	13.546	81.3993	6.78
80.1904	4.63	80.3728	6.22		80.7719	13.812	81.4683	6.81
80.2331	4.766	80.4164	6.23		80.8371	14.122	81.5373	6.83
80.2758	4.877	80.4601	6.24		80.9023	14.463	81.6063	6.86
80.3185	4.925	80.5037	6.25		80.9676	14.816	81.6753	6.88
80.3611	4.997	80.5474	6.27		81.0328	15.065	81.7443	6.91
80.4038	5.171	80.591	6.28		81.098	15.442	81.8133	6.93
80.4465	5.193	80.6347	6.29		81.1633	15.704	81.8823	6.96
80.4891	5.289	80.6783	6.3		81.2285	16.019	81.9513	6.99
80.5318	5.373	80.722	6.31		81.2938	16.34	82.0203	7.02
80.5745	5.472	80.7656	6.32		81.359	16.635	82.0893	7.05
80.6172	5.551	80.8093	6.34		81.4242	16.952	82.1583	7.08
80.6598	5.656	80.8529	6.35		81.4895	17.297	82.2273	7.11
80.7025	5.749	80.8966	6.36		81.5547	17.615	82.2963	7.14
80.7452	5.858	80.9402	6.37		81.6199	17.954	82.3653	7.17
80.7879	5.976	80.9839	6.38		81.6852	18.314	82.4343	7.2
80.8305	5.978	81.0275	6.4		81.7504	18.743	82.5033	7.24
80.8732	6.071	81.0712	6.41		81.8156	19.077	82.5723	7.27
80.9159	6.192	81.1148	6.41		81.8809	19.516	82.6413	7.31
80.9585	6.246	81.1585	6.43		81.9461	19.914	82.7103	7.34
81.0012	6.319	81.2021	6.44		82.0113	20.352	82.7793	7.38
81.0439	6.426	81.2458	6.45		82.0766	20.82	82.8483	7.41
81.0866	6.453	81.2894	6.46		82.1418	21.328	82.9173	7.45
81.1292	6.6	81.3331	6.46		82.2071	21.749	82.9863	7.48
81.1719	6.629	81.3767	6.47		82.2723	22.293	83.0554	7.52
81.2146	6.729	81.4204	6.48		82.3375	22.745	83.1244	7.56
81.2573	6.78	81.464	6.49		82.4028	23.318	83.1934	7.59
81.2999	6.851	81.5077	6.5		82.468	23.881	83.2624	7.63
81.3426	6.943	81.5513	6.51		82.5332	24.393	83.3314	7.67
81.3853	7.004	81.595	6.52		82.5985	24.968	83.4004	7.7
81.428	7.024	81.6386	6.53		82.6637	25.552	83.4694	7.74
81.4706	7.085	81.6823	6.54		82.7289	26.081	83.5384	7.77
81.5133	7.188	81.7259	6.55		82.7942	26.714	83.6074	7.81
81.556	7.26	81.7696	6.55		82.8594	27.337	83.6764	7.84
81.5986	7.329	81.8132	6.56		82.9246	27.978	83.7454	7.87
81.6413	7.322	81.8569	6.57		82.9899	28.703	83.8144	7.91
81.684	7.432	81.9005	6.58		83.0551	29.438	83.8834	7.95
81.7267	7.472	81.9442	6.59		83.1204	30.221	83.9524	7.98
81.7693	7.563	81.9878	6.6		83.1856	31.213	84.0214	8.02
81.812	7.533	82.0315	6.61		83.2508	32.12	84.0904	8.05
81.8547	7.64	82.0751	6.62		83.3161	33.252	84.1594	8.09
81.8974	7.701	82.1188	6.63		83.3813	34.386	84.2284	8.12
81.94	7.764	82.1624	6.64		83.4465	35.519	84.2974	8.15
81.9827	7.815	82.2061	6.65		83.5118	36.849	84.3664	8.18
82.0254	7.87	82.2497	6.66		83.577	38.114	84.4354	8.22
82.068	7.916	82.2934	6.67		83.6422	39.48	84.5044	8.25
82.1107	7.968	82.337	6.68		83.7075	40.926	84.5734	8.28
82.1534	8.058	82.3807	6.68		83.7727	42.176	84.6424	8.32
82.1961	8.078	82.4243	6.69		83.8379	43.579	84.7114	8.35
82.2387	8.131	82.468	6.71		83.9032	44.891	84.7804	8.38
82.2814	8.25	82.5116	6.72		83.9684	46.103	84.8494	8.42
82.3241	8.239	82.5553	6.73		84.0337	47.318	84.9185	8.45
82.3668	8.255	82.5989	6.74		84.0989	48.492	84.9875	8.48
82.4094	8.257	82.6426	6.75		84.1641	49.55	85.0565	8.51
82.4521	8.364	82.6862	6.76		84.2294	50.603	85.1255	8.54
82.4948	8.435	82.7299	6.77		84.2946	51.624	85.1945	8.58
82.5374	8.434	82.7735	6.78		84.3598	52.54	85.2635	8.61
82.5801	8.47	82.8172	6.8		84.4251	53.482	85.3325	8.64
82.6228	8.52	82.8608	6.8		84.4903	54.387	85.4015	8.68
82.6655	8.539	82.9045	6.82		84.5555	55.275	85.4705	8.71
82.7081	8.553	82.9481	6.83		84.6208	56.188	85.5395	8.75
82.7508	8.628	82.9918	6.84		84.686	56.991	85.6085	8.79
82.7935	8.627	83.0354	6.85		84.7512	57.826	85.6775	8.82
82.8362	8.651	83.079	6.86		84.8165	58.715	85.7465	8.84
82.8788	8.718	83.1227	6.88		84.8817	59.547	85.8155	8.88
82.9215	8.691	83.1663	6.89		84.947	60.353	85.8845	8.92
82.9642	8.726	83.21	6.9		85.0122	61.272	85.9535	8.95
83.0069	8.747	83.2536	6.91		85.0774	62.058	86.0225	8.99
83.0495	8.771	83.2973	6.92		85.1427	62.911	86.0915	9.02
83.0922	8.801	83.3409	6.93		85.2079	63.69	86.1605	9.05
83.1349	8.811	83.3846	6.95		85.2731	64.4	86.2295	9.09
83.1775	8.782	83.4282	6.96		85.3384	65.129	86.2985	9.12
83.2202	8.871	83.4719	6.97		85.4036	65.579	86.3675	9.15
83.2629	8.876	83.5155	6.98		85.4688	65.887	86.4365	9.18
83.3056	8.901	83.5592	7		85.5341	65.866	86.5055	9.21
83.3482	8.917	83.6028	7.01		85.5993	65.642	86.5745	9.24
83.3909	8.976	83.6465	7.03		85.6645	65.038	86.6435	9.28
83.4336	8.995	83.6901	7.04		85.7298	64.276	86.7125	9.31
83.4763	9.036	83.7338	7.05		85.795	63.176	86.7815	9.34
83.5189	9.043	83.7774	7.07		85.8603	62.128	86.8506	9.38
83.5616	9.106	83.8211	7.08		85.9255	60.987	86.9196	9.41
83.6043	9.168	83.8647	7.09		85.9907	60	86.9886	9.45
83.6469	9.158	83.9084	7.11		86.056	58.86	87.0576	9.48
83.6896	9.221	83.952	7.12		86.1212	58.057	87.1266	9.51
83.7323	9.226	83.9957	7.13		86.1864	57.171	87.1956	9.54
83.775	9.264	84.0393	7.15		86.2517	56.389	87.2646	9.57
83.8176	9.332	84.083	7.16		86.3169	55.69	87.3336	9.62
83.8603	9.341	84.1266	7.18		86.3821	55.004	87.4026	9.64
83.903	9.413	84.1703	7.19		86.4474	54.302	87.4716	9.68
83.9457	9.418	84.2139	7.2		86.5126	53.613	87.5406	9.71
83.9883	9.51	84.2576	7.22		86.5778	52.7	87.6096	9.74
84.031	9.51	84.3012	7.23		86.6431	51.763	87.6786	9.78
84.0737	9.51	84.3449	7.24		86.7083	50.601	87.7476	9.81
84.1164	9.538	84.3885	7.25		86.7736	49.426	87.8166	9.85
84.159	9.616	84.4322	7.27		86.8388	48.123	87.8856	9.87
84.2017	9.612	84.4758	7.28		86.904	46.657	87.9546	9.91
84.2444	9.661	84.5195	7.29		86.9693	45.101	88.0236	9.94
84.287	9.625	84.5631	7.3		87.0345	43.654	88.0926	9.97
84.3297	9.613	84.6068	7.32		87.0997	42.034	88.1616	10.01
84.3724	9.688	84.6504	7.33		87.165	40.544	88.2306	10.04
84.4151	9.723	84.6941	7.34		87.2302	39.127	88.2996	10.07
84.4577	9.72	84.7377	7.36		87.2954	37.677	88.3686	10.11
84.5004	9.728	84.7814	7.37		87.3607	36.492	88.4376	10.14
84.5431	9.757	84.825	7.38		87.4259	35.21	88.5066	10.17
84.5858	9.772	84.8687	7.4		87.4911	34.046	88.5756	10.2
84.6284	9.805	84.9123	7.41		87.5564	32.947	88.6446	10.23
84.6711	9.761	84.956	7.43		87.6216	31.788	88.7137	10.26
84.7138	9.773	84.9996	7.44		87.6869	30.777	88.7827	10.29
84.7564	9.756	85.0433	7.45		87.7521	29.689	88.8517	10.32
84.7991	9.797	85.0869	7.47		87.8173	28.653	88.9207	10.36
84.8418	9.764	85.1306	7.48		87.8826	27.681	88.9897	10.38
84.8845	9.788	85.1742	7.5		87.9478	26.762	89.0587	10.41
84.9271	9.781	85.2179	7.51		88.013	25.788	89.1277	10.45
84.9698	9.802	85.2615	7.53		88.0783	24.921	89.1967	10.48
85.0125	9.761	85.3052	7.54		88.1435	24.048	89.2657	10.5
85.0552	9.772	85.3488	7.55		88.2087	23.161	89.3347	10.54
85.0978	9.802	85.3925	7.57		88.274	22.447	89.4037	10.56
85.1405	9.813	85.4361	7.58		88.3392	21.656	89.4727	10.6
85.1832	9.774	85.4798	7.6		88.4044	20.982	89.5417	10.63
85.2259	9.749	85.5234	7.61		88.4697	20.297	89.6107	10.66
85.2685	9.793	85.5671	7.63		88.5349	19.687	89.6797	10.69
85.3112	9.722	85.6107	7.64		88.6002	19.142	89.7487	10.72
85.3539	9.75	85.6544	7.66		88.6654	18.497	89.8177	10.75
85.3965	9.796	85.698	7.67		88.7306	17.935	89.8867	10.78
85.4392	9.734	85.7417	7.69		88.7959	17.523	89.9557	10.8
85.4819	9.744	85.7853	7.7		88.8611	17.036	90.0247	10.84
85.5246	9.745	85.829	7.72		88.9263	16.554	90.0937	10.87
85.5672	9.758	85.8726	7.74		88.9916	16.164	90.1627	10.91
85.6099	9.771	85.9162	7.75		89.0568	15.768	90.2317	10.93
85.6526	9.776	85.9599	7.77		89.122	15.411	90.3007	10.97
85.6953	9.78	86.0035	7.78		89.1873	15.07	90.3697	11
85.7379	9.795	86.0472	7.81		89.2525	14.709	90.4387	11.03
85.7806	9.768	86.0908	7.82		89.3177	14.425	90.5077	11.07
85.8233	9.789	86.1345	7.84		89.383	14.111	90.5768	11.1
85.8659	9.848	86.1781	7.86		89.4482	13.827	90.6458	11.13
85.9086	9.889	86.2218	7.87		89.5135	13.593	90.7148	11.16
85.9513	9.858	86.2654	7.89		89.5787	13.396	90.7838	11.19
85.994	9.877	86.3091	7.91		89.6439	13.213	90.8528	11.22
86.0366	9.891	86.3527	7.92		89.7092	13.131	90.9218	11.26
86.0793	9.973	86.3964	7.94		89.7744	13.082	90.9908	11.29
86.122	9.95	86.44	7.96		89.8396	13.126	91.0598	11.32
86.1647	10.003	86.4837	7.98		89.9049	13.487	91.1288	11.35
86.2073	10.051	86.5273	8		89.9701	13.964	91.1978	11.39
86.25	10.063	86.571	8.02		90.0353	14.726	91.2668	11.42
86.2927	10.139	86.6146	8.03		90.1006	15.808	91.3358	11.45
86.3354	10.194	86.6583	8.05		90.1658	17.217	91.4048	11.49
86.378	10.26	86.7019	8.07		90.231	18.648	91.4738	11.52
86.4207	10.281	86.7456	8.09		90.2963	20.316	91.5428	11.56
86.4634	10.341	86.7892	8.11		90.3615	21.845	91.6118	11.59
86.506	10.354	86.8329	8.13		90.4268	23.172	91.6808	11.62
86.5487	10.414	86.8765	8.15		90.492	24.361	91.7498	11.66
86.5914	10.483	86.9202	8.17		90.5572	25.126	91.8188	11.69
86.6341	10.533	86.9638	8.19		90.6225	25.546	91.8878	11.72
86.6767	10.591	87.0075	8.21		90.6877	25.581	91.9568	11.76
86.7194	10.629	87.0511	8.23		90.7529	25.359	92.0258	11.79
86.7621	10.711	87.0948	8.25		90.8182	24.824	92.0948	11.82
86.8048	10.781	87.1384	8.27		90.8834	24.047	92.1638	11.85
86.8474	10.832	87.1821	8.29		90.9486	23.166	92.2328	11.89
86.8901	10.851	87.2257	8.31		91.0139	22.108	92.3018	11.92
86.9328	10.925	87.2694	8.33		91.0791	20.998	92.3708	11.96
86.9754	11.017	87.313	8.35		91.1443	19.938	92.4399	12
87.0181	11.1	87.3567	8.38		91.2096	18.692	92.5089	12.03
87.0608	11.13	87.4003	8.4		91.2748	17.557	92.5779	12.07
87.1035	11.175	87.444	8.42		91.3401	17.169	92.6469	12.11
87.1461	11.29	87.4876	8.44		91.4053	15.89	92.7159	12.14
87.1888	11.289	87.5313	8.46		91.4705	14.453	92.7849	12.17
87.2315	11.349	87.5749	8.48		91.5358	13.569	92.8539	12.21
87.2742	11.433	87.6186	8.51		91.601	12.697	92.9229	12.25
87.3168	11.486	87.6622	8.53		91.6662	11.995	92.9919	12.29
87.3595	11.53	87.7059	8.55		91.7315	11.3	93.0609	12.33
87.4022	11.584	87.7495	8.57		91.7967	10.756	93.1299	12.37
87.4449	11.589	87.7932	8.58		91.8619	10.29	93.1989	12.4
87.4875	11.675	87.8368	8.61		91.9272	9.863	93.2679	12.44
87.5302	11.746	87.8805	8.63		91.9924	9.547	93.3369	12.48
87.5729	11.748	87.9241	8.65		92.0576	9.188	93.4059	12.51
87.6155	11.84	87.9678	8.67		92.1229	8.903	93.4749	12.55
87.6582	11.929	88.0114	8.69		92.1881	8.667	93.5439	12.58
87.7009	11.871	88.0551	8.71		92.2534	8.449	93.6129	12.62
87.7436	11.944	88.0987	8.74		92.3186	8.308	93.6819	12.65
87.7862	12.007	88.1424	8.76		92.3838	8.119	93.7509	12.69
87.8289	12	88.186	8.78		92.4491	7.895	93.8199	12.73
87.8716	12.002	88.2297	8.8		92.5143	7.784	93.8889	12.76
87.9143	12.083	88.2733	8.82		92.5795	7.625	93.9579	12.8
87.9569	12.118	88.317	8.84		92.6448	7.456	94.0269	12.83
87.9996	12.107	88.3606	8.86		92.71	7.255	94.0959	12.87
88.0423	12.149	88.4043	8.88		92.7752	7.135	94.1649	12.9
88.0849	12.107	88.4479	8.9		92.8405	7.003	94.2339	12.94
88.1276	12.212	88.4916	8.92		92.9057	6.843	94.303	12.97
88.1703	12.201	88.5352	8.94		92.9709	6.711	94.372	13.01
88.213	12.265	88.5789	8.97		93.0362	6.518	94.441	13.04
88.2556	12.31	88.6225	8.98		93.1014	6.442	94.51	13.08
88.2983	12.316	88.6662	9		93.1667	6.295	94.579	13.11
88.341	12.341	88.7098	9.03		93.2319	6.159	94.648	13.15
88.3837	12.329	88.7534	9.05		93.2971	6.033	94.717	13.18
88.4263	12.405	88.7971	9.07		93.3624	5.907	94.786	13.21
88.469	12.37	88.8407	9.09		93.4276	5.805	94.855	13.25
88.5117	12.462	88.8844	9.11		93.4928	5.697	94.924	13.28
88.5544	12.491	88.928	9.14		93.5581	5.615	94.993	13.32
88.597	12.543	88.9717	9.16		93.6233	5.525	95.062	13.36
88.6397	12.601	89.0153	9.18		93.6885	5.471	95.131	13.4
88.6824	12.575	89.059	9.2		93.7538	5.354	95.2	13.43
88.725	12.654	89.1026	9.22		93.819	5.244	95.269	13.47
88.7677	12.74	89.1463	9.24		93.8842	5.144	95.338	13.51
88.8104	12.79	89.1899	9.27		93.9495	5.049	95.407	13.55
88.8531	12.858	89.2336	9.29		94.0147	4.97	95.476	13.58
88.8957	12.933	89.2772	9.31		94.08	4.937	95.545	13.62
88.9384	12.986	89.3209	9.33		94.1452	4.88	95.614	13.66
88.9811	13.043	89.3645	9.35		94.2104	4.807	95.683	13.69
89.0238	13.156	89.4082	9.38		94.2757	4.722	95.752	13.73
89.0664	13.185	89.4518	9.4		94.3409	4.644	95.821	13.76
89.1091	13.318	89.4955	9.42		94.4061	4.536	95.89	13.8
89.1518	13.38	89.5391	9.45		94.4714	4.507	95.959	13.84
89.1944	13.477	89.5828	9.47		94.5366	4.422	96.028	13.87
89.2371	13.56	89.6264	9.5		94.6018	4.368	96.097	13.91
89.2798	13.616	89.6701	9.52		94.6671	4.304	96.1661	13.95
89.3225	13.732	89.7137	9.54		94.7323	4.217	96.2351	13.98
89.3651	13.827	89.7574	9.57		94.7975	4.188	96.3041	14.02
89.4078	13.913	89.801	9.59		94.8628	4.108	96.3731	14.06
89.4505	14.066	89.8447	9.61		94.928	4.053	96.4421	14.1
89.4932	14.173	89.8883	9.64		94.9933	3.971	96.5111	14.14
89.5358	14.208	89.932	9.66		95.0585	3.931	96.5801	14.18
89.5785	14.389	89.9756	9.69		95.1237	3.861	96.6491	14.22
89.6212	14.521	90.0193	9.71		95.189	3.794	96.7181	14.26
89.6639	14.636	90.0629	9.73		95.2542	3.786	96.7871	14.3
89.7065	14.766	90.1066	9.76		95.3194	3.688	96.8561	14.33
89.7492	14.848	90.1502	9.78		95.3847	3.668	96.9251	14.37
89.7919	14.985	90.1939	9.81		95.4499	3.625	96.9941	14.41
89.8345	15.119	90.2375	9.83		95.5151	3.6	97.0631	14.45
89.8772	15.255	90.2812	9.86		95.5804	3.543	97.1321	14.49
89.9199	15.399	90.3248	9.88		95.6456	3.524	97.2011	14.53
89.9626	15.497	90.3685	9.91		95.7108	3.474	97.2701	14.57
90.0052	15.615	90.4121	9.93		95.7761	3.508	97.3391	14.61
90.0479	15.777	90.4558	9.95		95.8413	3.415	97.4081	14.65
90.0906	15.895	90.4994	9.98		95.9066	3.386	97.4771	14.69
90.1333	16.057	90.5431	10.01		95.9718	3.345	97.5461	14.72
90.1759	16.178	90.5867	10.03		96.037	3.397	97.6151	14.76
90.2186	16.274	90.6304	10.06		96.1023	3.365	97.6841	14.8
90.2613	16.463	90.674	10.08		96.1675	3.321	97.7531	14.84
90.3039	16.602	90.7177	10.11		96.2327	3.348	97.8221	14.88
90.3466	16.732	90.7613	10.13		96.298	3.357	97.8911	14.92
90.3893	16.896	90.805	10.15		96.3632	3.351	97.9601	14.95
90.432	17.03	90.8486	10.18		96.4284	3.346	98.0292	14.99
90.4746	17.182	90.8923	10.2		96.4937	3.382	98.0982	15.03
90.5173	17.367	90.9359	10.23		96.5589	3.371	98.1672	15.06
90.56	17.481	90.9796	10.26		96.6241	3.429	98.2362	15.1
90.6027	17.631	91.0232	10.28		96.6894	3.383	98.3052	15.13
90.6453	17.757	91.0669	10.3		96.7546	3.377	98.3742	15.17
90.688	17.891	91.1105	10.32		96.8199	3.432	98.4432	15.21
90.7307	18.077	91.1542	10.34		96.8851	3.488	98.5122	15.24
90.7733	18.232	91.1978	10.37		96.9503	3.459	98.5812	15.28
90.816	18.383	91.2415	10.39		97.0156	3.463	98.6502	15.32
90.8587	18.503	91.2851	10.41		97.0808	3.52	98.7192	15.35
90.9014	18.639	91.3288	10.44		97.146	3.513	98.7882	15.39
90.944	18.781	91.3724	10.46		97.2113	3.486	98.8572	15.43
90.9867	18.88	91.4161	10.48		97.2765	3.479	98.9262	15.46
91.0294	19.027	91.4597	10.5		97.3417	3.494	98.9952	15.5
91.0721	19.119	91.5034	10.52		97.407	3.535	99.0642	15.54
91.1147	19.228	91.547	10.55		97.4722	3.568	99.1332	15.58
91.1574	19.283	91.5906	10.57		97.5374	3.551	99.2022	15.62
91.2001	19.376	91.6343	10.59		97.6027	3.571	99.2712	15.66
91.2428	19.431	91.6779	10.61		97.6679	3.554	99.3402	15.7
91.2854	19.41	91.7216	10.63		97.7332	3.519	99.4092	15.73
91.3281	19.413	91.7652	10.65		97.7984	3.475	99.4782	15.77
91.3708	19.459	91.8089	10.67		97.8636	3.422	99.5472	15.81
91.4134	19.416	91.8525	10.69		97.9289	3.374	99.6162	15.84
91.4561	19.352	91.8962	10.71		97.9941	3.41	99.6852	15.88
91.4988	19.235	91.9398	10.74		98.0593	3.413	99.7542	15.91
91.5415	19.287	91.9835	10.76		98.1246	3.351	99.8232	15.94
91.5841	20.635	92.0271	10.78		98.1898	3.329	99.8923	15.98
91.6268	20.477	92.0708	10.8		98.255	3.298	99.9613	16.01
91.6695	20.288	92.1144	10.82		98.3203	3.285	100.03	16.04
91.7122	20.102	92.1581	10.85		98.3855	3.233	100.099	16.07
91.7548	19.924	92.2017	10.87		98.4507	3.159	100.168	16.11
91.7975	19.691	92.2454	10.89		98.516	3.242	100.237	16.13
91.8402	19.453	92.289	10.91		98.5812	3.281	100.306	16.16
91.8828	19.125	92.3327	10.93		98.6465	3.288	100.375	16.2
91.9255	18.886	92.3763	10.95		98.7117	3.292	100.444	16.23
91.9682	18.611	92.42	10.97		98.7769	3.339	100.513	16.26
92.0109	18.294	92.4636	10.99		98.8422	3.398	100.582	16.29
92.0535	17.991	92.5073	11.02		98.9074	3.477	100.651	16.32
92.0962	17.689	92.5509	11.04		98.9726	3.65	100.72	16.35
92.1389	17.332	92.5946	11.05		99.0379	3.884	100.789	16.38
92.1816	17.019	92.6382	11.08		99.1031	4.225	100.858	16.42
92.2242	16.687	92.6819	11.1		99.1683	4.698	100.927	16.45
92.2669	16.395	92.7255	11.11		99.2336	5.388	100.996	16.48
92.3096	16.117	92.7692	11.14		99.2988	6.356	101.065	16.51
92.3523	15.846	92.8128	11.16		99.364	7.454	101.134	16.54
92.3949	15.508	92.8565	11.18		99.4293	8.965	101.203	16.57
92.4376	15.248	92.9001	11.2		99.4945	10.539	101.272	16.6
92.4803	14.991	92.9438	11.21		99.5598	12.282	101.341	16.63
92.5229	14.763	92.9874	11.24		99.625	14.245	101.41	16.66
92.5656	14.501	93.0311	11.26		99.6902	15.988	101.479	16.69
92.6083	14.353	93.0747	11.28		99.7555	17.721	101.548	16.72
92.651	14.131	93.1184	11.3		99.8207	19.21	101.617	16.75
92.6936	13.935	93.162	11.32		99.8859	20.538	101.686	16.78
92.7363	13.771	93.2057	11.34		99.9512	21.643	101.755	16.81
92.779	13.598	93.2493	11.36		100.016	22.469	101.824	16.84
92.8217	13.512	93.293	11.38		100.082	23.02	101.893	16.87
92.8643	13.435	93.3366	11.4		100.147	23.427	101.962	16.9
92.907	13.348	93.3803	11.42		100.212	23.77	102.031	16.93
92.9497	13.27	93.4239	11.44		100.277	23.935	102.1	16.96
92.9923	13.216	93.4676	11.46		100.343	23.985	102.169	16.99
93.035	13.223	93.5112	11.48		100.408	23.846	102.238	17.02
93.0777	13.205	93.5549	11.5		100.473	23.575	102.307	17.05
93.1204	13.204	93.5985	11.52		100.538	23.365	102.376	17.07
93.163	13.235	93.6422	11.53		100.604	22.947	102.445	17.11
93.2057	13.271	93.6858	11.55		100.669	22.467	102.514	17.14
93.2484	13.286	93.7295	11.57		100.734	21.861	102.583	17.16
93.2911	13.36	93.7731	11.59		100.799	21.447	102.652	17.19
93.3337	13.463	93.8168	11.61		100.864	20.798	102.721	17.22
93.3764	13.542	93.8604	11.63		100.93	20.204	102.79	17.25
93.4191	13.643	93.9041	11.65		100.995	19.599	102.859	17.28
93.4618	13.792	93.9477	11.67		101.06	18.906	102.928	17.31
93.5044	13.96	93.9914	11.69		101.125	18.335	102.997	17.33
93.5471	14.147	94.035	11.7		101.191	17.652	103.066	17.36
93.5898	14.376	94.0787	11.72		101.256	16.972	103.135	17.39
93.6324	14.631	94.1223	11.74		101.321	16.45	103.204	17.42
93.6751	14.948	94.166	11.76		101.386	15.797	103.273	17.45
93.7178	15.313	94.2096	11.78		101.452	15.186	103.342	17.48
93.7605	15.761	94.2533	11.8		101.517	14.641	103.411	17.51
93.8031	16.362	94.2969	11.82		101.582	14.029	103.48	17.54
93.8458	17.146	94.3406	11.83		101.647	13.512	103.549	17.56
93.8885	17.995	94.3842	11.85		101.713	12.987	103.618	17.59
93.9312	19.293	94.4279	11.87		101.778	12.395	103.687	17.62
93.9738	20.778	94.4715	11.89		101.843	11.918	103.756	17.64
94.0165	22.74	94.5151	11.91		101.908	11.372	103.825	17.67
94.0592	25.334	94.5588	11.93		101.973	10.909	103.894	17.7
94.1018	28.325	94.6024	11.95		102.039	10.419	103.963	17.73
94.1445	32.297	94.6461	11.97		102.104	9.924	104.032	17.75
94.1872	36.862	94.6897	11.99		102.169	9.497	104.101	17.77
94.2299	42.63	94.7334	12.01		102.234	9.097	104.17	17.81
94.2725	49.679	94.777	12.03		102.3	8.727	104.239	17.85
94.3152	57.219	94.8207	12.04		102.365	8.388	104.308	17.86
94.3579	66.098	94.8643	12.06		102.43	8.009	104.377	17.89
94.4006	76.006	94.908	12.08		102.495	7.649	104.446	17.92
94.4432	86.387	94.9516	12.1		102.561	7.408	104.515	17.95
94.4859	98.025	94.9953	12.12		102.626	7.131	104.585	17.98
94.5286	108.998	95.0389	12.14		102.691	6.86	104.654	18.01
94.5713	121.057	95.0826	12.16		102.756	6.616	104.723	18.04
94.6139	132.945	95.1262	12.18		102.822	6.364	104.792	18.07
94.6566	144.217	95.1699	12.2		102.887	6.165	104.861	18.09
94.6993	155.762	95.2135	12.22		102.952	5.965	104.93	18.12
94.7419	165.795	95.2572	12.24		103.017	5.753	104.999	18.15
94.7846	176.393	95.3008	12.26		103.082	5.551	105.068	18.18
94.8273	185.175	95.3445	12.28		103.148	5.376	105.137	18.19
94.87	193.979	95.3881	12.3		103.213	5.154	105.206	18.21
94.9126	201.986	95.4318	12.32		103.278	5.015	105.275	18.24
94.9553	208.954	95.4754	12.34		103.343	4.807	105.344	18.26
94.998	215.569	95.5191	12.36		103.409	4.671	105.413	18.29
95.0407	221.111	95.5627	12.38		103.474	4.568	105.482	18.31
95.0833	226.013	95.6064	12.4		103.539	4.419	105.551	18.34
95.126	230.313	95.65	12.42		103.604	5.832	105.62	18.37
95.1687	233.72	95.6937	12.44		103.67	5.773	105.689	18.4
95.2113	236.498	95.7373	12.46		103.735	5.694	105.758	18.43
95.254	238.651	95.781	12.48		103.8	5.64	105.827	18.46
95.2967	239.883	95.8246	12.5		103.865	5.512	105.896	18.49
95.3394	240.857	95.8683	12.52		103.931	5.455	105.965	18.52
95.382	241.29	95.9119	12.54		103.996	5.389	106.034	18.56
95.4247	241.227	95.9556	12.56		104.061	5.357	106.103	18.58
95.4674	240.639	95.9992	12.59		104.126	5.241	106.172	18.61
95.5101	239.448	96.0429	12.61		104.191	5.17	106.241	18.64
95.5527	237.974	96.0865	12.63		104.257	5.087	106.31	18.68
95.5954	235.926	96.1302	12.65		104.322	5.056	106.379	18.71
95.6381	233.559	96.1738	12.67		104.387	5.025	106.448	18.74
95.6808	231.105	96.2175	12.7		104.452	4.89	106.517	18.76
95.7234	227.989	96.2611	12.72		104.518	4.849	106.586	18.79
95.7661	224.183	96.3048	12.74		104.583	4.798	106.655	18.82
95.8088	220.479	96.3484	12.77		104.648	4.732	106.724	18.85
95.8514	216.05	96.3921	12.79		104.713	4.588	106.793	18.88
95.8941	211.578	96.4357	12.81		104.779	4.575	106.862	18.91
95.9368	206.72	96.4794	12.84		104.844	4.498	106.931	18.94
95.9795	201.737	96.523	12.86		104.909	4.471	107	18.98
96.0221	196.677	96.5667	12.88		104.974	4.388	107.069	19.01
96.0648	191.009	96.6103	12.91		105.04	4.336	107.138	19.04
96.1075	185.418	96.654	12.93		105.105	4.351	107.207	19.07
96.1502	179.937	96.6976	12.95		105.17	4.285	107.276	19.1
96.1928	173.819	96.7413	12.97		105.235	4.219	107.345	19.13
96.2355	168.207	96.7849	12.99		105.3	4.213	107.414	19.17
96.2782	162.28	96.8286	13.02		105.366	4.189	107.483	19.2
96.3208	156.156	96.8722	13.04		105.431	4.244	107.552	19.23
96.3635	150.066	96.9159	13.06		105.496	4.185	107.621	19.27
96.4062	143.672	96.9595	13.09		105.561	4.189	107.69	19.3
96.4489	137.106	97.0032	13.11		105.627	4.206	107.759	19.34
96.4915	131.063	97.0468	13.13		105.692	4.188	107.828	19.37
96.5342	125.098	97.0905	13.16		105.757	4.136	107.897	19.4
96.5769	119.167	97.1341	13.18		105.822	4.043	107.966	19.44
96.6196	113.469	97.1778	13.2		105.888	3.997	108.035	19.47
96.6622	107.66	97.2214	13.22		105.953	3.872	108.104	19.51
96.7049	101.82	97.2651	13.24		106.018	3.754	108.173	19.55
96.7476	96.487	97.3087	13.27		106.083	3.651	108.242	19.58
96.7903	91.42	97.3523	13.29		106.149	3.536	108.311	19.63
96.8329	86.377	97.396	13.32		106.214	3.463	108.38	19.67
96.8756	81.993	97.4396	13.34		106.279	3.363	108.449	19.71
96.9183	77.371	97.4833	13.36		106.344	3.303	108.518	19.76
96.9609	73.13	97.5269	13.39		106.41	3.144	108.587	19.79
97.0036	69.283	97.5706	13.41		106.475	3.14	108.656	19.82
97.0463	65.658	97.6142	13.43		106.54	3.062	108.725	19.87
97.089	62.162	97.6579	13.46		106.605	3.011	108.794	19.91
97.1316	59.225	97.7015	13.48		106.67	2.985	108.863	19.94
97.1743	56.442	97.7452	13.5		106.736	2.959	108.932	19.98
97.217	53.952	97.7888	13.53		106.801	2.954	109.001	20.02
97.2597	51.613	97.8325	13.55		106.866	2.901	109.07	20.06
97.3023	49.534	97.8761	13.57		106.931	2.829	109.139	20.1
97.345	47.554	97.9198	13.6		106.997	2.819	109.208	20.14
97.3877	45.886	97.9634	13.62		107.062	2.787	109.277	20.18
97.4303	44.277	98.0071	13.65		107.127	2.742	109.346	20.21
97.473	42.754	98.0507	13.67		107.192	2.709	109.415	20.25
97.5157	41.434	98.0944	13.69		107.258	2.732	109.484	20.29
97.5584	40	98.138	13.72		107.323	2.73	109.553	20.33
97.601	38.82	98.1817	13.74		107.388	2.797	109.622	20.37
97.6437	37.657	98.2253	13.76		107.453	2.706	109.691	20.41
97.6864	36.565	98.269	13.79		107.519	2.635	109.76	20.44
97.7291	35.418	98.3126	13.81		107.584	2.649	109.829	20.48
97.7717	34.354	98.3563	13.83		107.649	2.628	109.898	20.51
97.8144	33.346	98.3999	13.85		107.714	2.639	109.967	20.55
97.8571	32.244	98.4436	13.87		107.779	2.599	110.036	20.58
97.8998	31.196	98.4872	13.9		107.845	2.654	110.105	20.61
97.9424	30.174	98.5309	13.92		107.91	2.679	110.174	20.65
97.9851	29.233	98.5745	13.94		107.975	2.717	110.243	20.68
98.0278	28.279	98.6182	13.97		108.04	2.629	110.312	20.72
98.0704	27.24	98.6618	13.99		108.106	2.672	110.381	20.75
98.1131	26.283	98.7055	14.01		108.171	2.665	110.45	20.78
98.1558	25.339	98.7491	14.03		108.236	2.672	110.519	20.81
98.1985	24.407	98.7928	14.06		108.301	2.688	110.588	20.84
98.2411	23.581	98.8364	14.08		108.367	2.665	110.657	20.88
98.2838	22.748	98.8801	14.1		108.432	2.654	110.726	20.91
98.3265	21.876	98.9237	14.12		108.497	2.671	110.795	20.95
98.3692	21.068	98.9674	14.15		108.562	2.631	110.864	20.98
98.4118	20.314	99.011	14.17		108.628	2.623	110.933	21.02
98.4545	19.559	99.0547	14.19		108.693	2.584	111.002	21.07
98.4972	18.893	99.0983	14.22		108.758	2.561	111.071	21.1
98.5398	18.327	99.142	14.24		108.823	2.577	111.14	21.14
98.5825	17.688	99.1856	14.26		108.888	2.52	111.209	21.18
98.6252	17.044	99.2293	14.28		108.954	2.516	111.278	21.22
98.6679	16.553	99.2729	14.3		109.019	2.497	111.347	21.26
98.7105	15.934	99.3166	14.33		109.084	2.514	111.416	21.29
98.7532	15.492	99.3602	14.35		109.149	2.529	111.485	21.33
98.7959	14.974	99.4039	14.37		109.215	2.496	111.554	21.37
98.8386	14.534	99.4475	14.39		109.28	2.498	111.623	21.4
98.8812	14.129	99.4912	14.41		109.345	2.466	111.692	21.44
98.9239	13.739	99.5348	14.43		109.41	2.489	111.761	21.48
98.9666	13.355	99.5785	14.46		109.476	2.472	111.83	21.52
99.0092	13.055	99.6221	14.48		109.541	2.425	111.899	21.55
99.0519	12.721	99.6658	15.22		109.606	2.458	111.968	21.59
99.0946	12.452	99.7094	15.15		109.671	2.455	112.037	21.63
99.1373	12.215	99.7531	15.13		109.737	2.393	112.106	21.66
99.1799	11.931	99.7967	15.11		109.802	2.397	112.175	21.71
99.2226	11.696	99.8404	15.12		109.867	2.332	112.244	21.74
99.2653	11.515	99.884	15.14		109.932	2.336	112.313	21.78
99.308	11.223	99.9277	15.15		109.997	2.342	112.382	21.83
99.3506	11.085	99.9713	15.16		110.063	2.296	112.451	21.88
99.3933	10.934	100.015	15.18		110.128	2.256	112.52	21.92
99.436	10.795	100.059	15.2		110.193	2.329	112.589	21.96
99.4787	9.229	100.102	15.21		110.258	2.238	112.658	22
99.5213	9.125	100.146	15.22		110.324	2.27	112.727	22.04
99.564	8.965	100.19	15.24		110.389	2.209	112.796	22.08
99.6067	9.159	100.233	15.26		110.454	2.265	112.865	22.12
99.6493	8.744	100.277	15.27		110.519	2.255	112.934	22.16
99.692	9.086	100.32	15.3		110.585	2.296	113.003	22.19
99.7347	8.708	100.364	15.32		110.65	2.335	113.072	22.23
99.7774	8.476	100.408	15.33		110.715	2.369	113.141	22.27
99.82	8.311	100.451	15.35		110.78	0.869	113.21	22.31
99.8627	8.354	100.495	15.37		110.846	1.112	113.279	22.35
99.9054	8.472	100.539	15.38		110.911	0.873	113.348	22.38
99.9481	8.571	100.582	15.4		110.976	0.902	113.417	22.42
99.9907	8.569	100.626	15.42		111.041	0.849	113.486	22.45
100.033	8.615	100.67	15.44		111.106	0.848	113.555	22.5
100.076	8.614	100.713	15.46		111.172	0.839	113.624	22.54
100.119	8.643	100.757	15.48		111.237	0.806	113.693	22.58
100.161	8.678	100.801	15.5		111.302	0.831	113.762	22.62
100.204	8.643	100.844	15.51		111.367	0.828	113.831	22.66
100.247	8.698	100.888	15.54		111.433	0.774	113.9	22.7
100.289	8.711	100.932	15.56		111.498	0.737	113.969	22.75
100.332	8.775	100.975	15.57		111.563	0.687	114.038	22.78
100.375	8.828	101.019	15.59		111.628	0.651	114.107	22.82
100.417	8.849	101.063	15.62		111.694	0.707	114.176	22.86
100.46	8.971	101.106	15.63		111.759	0.705	114.245	22.89
100.503	9.066	101.15	15.66		111.824	0.748	114.314	22.94
100.545	9.179	101.193	15.67		111.889	0.775	114.383	22.98
100.588	9.143	101.237	15.7		111.955	0.747	114.452	23.03
100.631	9.25	101.281	15.72		112.02	0.845	114.521	23.08
100.673	9.348	101.324	15.74		112.085	0.836	114.59	23.13
100.716	9.499	101.368	15.76		112.15	0.865	114.659	23.19
100.759	9.729	101.412	15.78		112.215	0.849	114.728	23.25
100.802	10.603	101.455	15.8		112.281	0.882	114.797	23.33
100.844	11.709	101.499	15.82		112.346	0.907	114.866	23.4
100.887	11.213	101.543	15.84		112.411	0.895	114.935	23.48
100.93	9.711	101.586	16.03		112.476	0.933	115.004	23.57
100.972	9.348	101.63	15.98		112.542	0.958	115.073	23.67
101.015	9.81	101.674	16.06		112.607	0.972	115.142	23.78
101.058	10.273	101.717	16.16		112.672	0.952	115.211	23.88
101.1	10.633	101.761	16.24		112.737	0.925	115.28	24
101.143	10.907	101.805	16.32		112.803	0.969	115.349	24.12
101.186	11.2	101.848	16.34		112.868	0.908	115.418	24.27
101.228	11.463	101.892	16.34		112.933	1.037	115.487	24.42
101.271	11.757	101.936	16.34		112.998	1.093	115.556	24.56
101.314	12.044	101.979	16.35		113.064	1.128	115.625	24.73
101.356	12.479	102.023	16.36		113.129	1.149	115.694	24.91
101.399	13.022	102.066	16.38		113.194	1.22	115.763	25.14
101.442	13.502	102.11	16.4		113.259	1.269	115.832	25.36
101.484	14.153	102.154	16.42		113.324	1.275	115.901	25.62
101.527	15.411	102.197	16.45		113.39	1.315	115.97	25.85
101.57	15.733	102.241	16.48		113.455	1.321	116.039	26.12
101.612	16.625	102.285	16.5		113.52	1.396	116.108	26.39
101.655	17.932	102.328	16.53		113.585	1.417	116.177	26.67
101.698	19.555	102.372	16.56		113.651	1.337	116.246	26.98
101.74	20.805	102.416	16.58		113.716	1.391	116.315	27.3
101.783	22.184	102.459	16.62		113.781	1.387	116.384	27.65
101.826	23.513	102.503	16.65		113.846	1.357	116.453	28.01
101.868	25.217	102.547	16.69		113.912	1.279	116.522	28.38
101.911	27.281	102.59	16.72		113.977	1.256	116.591	28.74
101.954	29.6	102.634	16.75		114.042	1.185	116.66	29.13
101.996	32.126	102.678	16.79		114.107	1.122	116.729	29.54
102.039	34.379	102.721	16.82		114.173	1.17	116.798	29.96
102.082	36.936	102.765	16.85		114.238	1.128	116.867	30.4
102.124	39.246	102.809	16.89		114.303	1.143	116.936	30.87
102.167	41.543	102.852	16.93		114.368	1.182	117.005	31.35
102.21	43.693	102.896	16.96		114.433	1.183	117.074	31.85
102.252	45.607	102.939	16.99		114.499	1.234	117.143	32.32
102.295	47.345	102.983	17.02		114.564	1.343	117.212	32.85
102.338	48.694	103.027	17.05		114.629	1.428	117.281	33.41
102.38	49.781	103.07	17.08		114.694	1.502	117.35	33.93
102.423	50.651	103.114	17.11		114.76	1.614	117.419	34.5
102.466	51.12	103.158	17.14		114.825	1.692	117.488	35.11
102.508	51.02	103.201	17.16		114.89	1.87	117.557	35.72
102.551	50.935	103.245	17.18		114.955	2.065	117.626	36.36
102.594	50.607	103.289	17.2		115.021	2.264	117.695	36.96
102.636	50.225	103.332	17.21		115.086	2.492	117.764	37.54
102.679	49.678	103.376	17.23		115.151	2.721	117.833	38.22
102.722	49.027	103.42	17.24		115.216	2.98	117.902	38.88
102.764	47.894	103.463	17.26		115.282	3.276	117.971	39.53
102.807	46.688	103.507	17.27		115.347	3.58	118.04	40.18
102.85	45.529	103.551	17.28		115.412	3.975	118.109	40.87
102.892	44.241	103.594	17.29		115.477	4.458	118.178	41.56
102.935	42.816	103.638	17.3		115.543	4.989	118.247	42.18
102.978	41.408	103.681	17.31		115.608	5.552	118.316	42.78
103.021	40.093	103.725	17.31		115.673	6.12	118.385	43.44
103.063	38.621	103.769	17.32		115.738	6.773	118.454	44.06
103.106	37.22	103.812	17.32		115.803	7.502	118.523	44.72
103.149	36.035	103.856	17.33		115.869	8.25	118.592	45.35
103.191	34.587	103.9	17.33		115.934	8.909	118.661	46.07
103.234	33.329	103.943	17.33		115.999	9.822	118.73	46.67
103.277	32.046	103.987	17.33		116.064	10.905	118.799	47.28
103.319	30.772	104.031	17.33		116.13	12.097	118.868	47.88
103.362	29.613	104.074	17.33		116.195	14.164	118.937	48.49
103.405	28.503	104.118	17.34		116.26	17.457	119.006	49.1
103.447	27.374	104.162	17.34		116.325	21.892	119.075	49.69
103.49	26.442	104.205	17.34		116.391	27.131	119.144	50.28
103.533	25.483	104.249	17.35		116.456	31.032	119.213	50.87
103.575	24.532	104.293	17.35		116.521	33.36	119.282	51.47
103.618	23.57	104.336	17.35		116.586	33.535	119.351	52.06
103.661	22.728	104.38	17.35		116.652	32.393	119.42	52.58
103.703	21.933	104.424	17.35		116.717	30.21	119.489	53.12
103.746	21.147	104.467	17.35		116.782	28.023	119.558	53.63
103.789	20.5	104.511	17.35		116.847	25.665	119.627	54.14
103.831	19.846	104.554	17.35		116.912	23.765	119.696	54.64
103.874	19.212	104.598	17.36		116.978	22.256	119.765	55.13
103.917	18.662	104.642	17.36		117.043	21.06	119.834	55.61
103.959	18.075	104.685	17.36		117.108	19.997	119.903	56.08
104.002	17.543	104.729	17.36		117.173	18.877	119.972	56.55
104.045	16.938	104.773	17.37		117.239	17.886	120.041	56.99
104.087	16.482	104.816	17.37		117.304	16.945	120.11	57.41
104.13	16.001	104.86	17.38		117.369	16.621	120.179	57.84
104.173	15.507	104.904	17.38		117.434	16.825	120.248	58.24
104.215	15.11	104.947	17.39		117.5	16.56	120.317	58.62
104.258	14.662	104.991	17.4		117.565	15.95	120.386	58.99
104.301	14.269	105.035	17.4		117.63	16.06	120.455	59.34
104.343	13.851	105.078	17.41		117.695	19.68	120.524	59.67
104.386	13.512	105.122	17.42		117.761	25.905	120.593	59.97
104.429	13.186	105.166	17.43		117.826	29.848	120.662	60.25
104.471	12.839	105.209	17.44		117.891	29.536	120.731	60.52
104.514	12.551	105.253	17.45		117.956	28.091	120.8	60.79
104.557	12.284	105.297	17.47		118.021	30.433	120.869	61.03
104.599	12.03	105.34	17.49		118.087	42.011	120.938	61.25
104.642	11.793	105.384	17.5		118.152	71.995	121.007	61.47
104.685	11.532	105.427	17.52		118.217	124.41	121.076	61.66
104.727	11.27	105.471	17.53		118.282	157.973	121.145	61.84
104.77	11.098	105.515	17.55		118.348	150.046	121.214	62.01
104.813	10.864	105.558	17.57		118.413	114.591	121.283	62.2
104.855	10.676	105.602	17.58		118.478	78.88	121.352	62.34
104.898	10.491	105.646	17.6		118.543	55.908	121.421	62.45
104.941	10.361	105.689	17.62		118.609	40.57	121.49	62.55
104.983	10.164	105.733	17.63		118.674	29.804	121.559	62.67
105.026	10.002	105.777	17.65		118.739	23.721	121.628	62.77
105.069	9.908	105.82	17.66		118.804	19.373	121.697	62.88
105.111	9.717	105.864	17.68		118.87	17.141	121.766	62.97
105.154	9.659	105.908	17.7		118.935	15.332	121.835	63.05
105.197	9.553	105.951	17.71		119	13.909	121.904	63.13
105.24	9.427	105.995	17.73		119.065	12.69	121.973	63.21
105.282	9.361	106.039	17.74		119.13	11.768	122.042	63.28
105.325	9.266	106.082	17.76		119.196	10.943	122.111	63.35
105.368	9.137	106.126	17.77		119.261	10.232	122.18	63.41
105.41	9.021	106.169	17.79		119.326	9.537	122.249	63.48
105.453	8.984	106.213	17.8		119.391	8.943	122.318	63.54
105.496	8.866	106.257	17.82		119.457	8.38	122.387	65.1
105.538	8.824	106.3	17.83		119.522	7.951	122.456	65.04
105.581	8.699	106.344	17.85		119.587	7.488	122.525	65.02
105.624	8.624	106.388	17.86		119.652	7.01	122.594	64.79
105.666	8.523	106.431	17.88		119.718	6.557	122.663	64.8
105.709	8.475	106.475	17.89		119.783	6.172	122.732	48
105.752	8.408	106.519	17.91		119.848	5.739	122.801	64.61
105.794	8.352	106.562	17.93		119.913	5.367	122.87	64.61
105.837	8.297	106.606	17.94		119.979	5.09	122.939	64.62
105.88	8.219	106.65	17.96		120.044	4.7	123.008	64.64
105.922	8.192	106.693	17.97		120.109	4.441	123.077	64.65
105.965	8.123	106.737	17.99		120.174	4.139	123.146	64.67
106.008	8.107	106.781	18.01		120.239	3.803	123.215	64.69
106.05	8.007	106.824	18.02		120.305	3.607	123.285	64.72
106.093	8.023	106.868	18.04		120.37	3.366	123.354	64.75
106.136	7.971	106.912	18.06		120.435	3.218	123.423	64.78
106.178	7.936	106.955	18.07		120.5	2.948	123.492	64.8
106.221	7.881	106.999	18.09		120.566	2.771	123.561	64.83
106.264	7.846	107.042	18.1		120.631	2.611	123.63	64.86
106.306	7.828	107.086	18.12		120.696	2.489	123.699	64.9
106.349	7.771	107.13	18.14		120.761	2.334	123.768	64.95
106.392	7.758	107.173	18.15		120.827	2.229	123.837	64.99
106.434	7.723	107.217	18.17		120.892	3.54	123.906	65.04
106.477	7.657	107.261	18.19		120.957	3.451	123.975	65.09
106.52	7.631	107.304	18.21		121.022	3.358	124.044	65.14
106.562	7.652	107.348	18.23		121.088	3.282	124.113	65.19
106.605	7.593	107.392	18.25		121.153	3.139	124.182	65.23
106.648	7.543	107.435	18.26		121.218	3.12	124.251	65.27
106.69	7.505	107.479	18.29		121.283	3.03	124.32	65.31
106.733	7.497	107.523	18.31		121.348	2.907	124.389	65.34
106.776	7.483	107.566	18.33		121.414	2.848	124.458	65.37
106.818	7.423	107.61	18.35		121.479	2.831	124.527	65.39
106.861	7.391	107.654	18.37		121.544	2.756	124.596	65.43
106.904	7.384	107.697	18.4		121.609	2.719	124.665	65.45
106.946	7.323	107.741	18.42		121.675	2.665	124.734	65.47
106.989	7.35	107.785	18.44		121.74	2.611	124.803	65.5
107.032	7.286	107.828	18.47		121.805	2.605	124.872	65.52
107.074	7.282	107.872	18.5		121.87	2.539	124.941	65.55
107.117	7.243	107.915	18.52		121.936	2.54	125.01	65.58
107.16	7.253	107.959	18.55		122.001	2.506	125.079	65.6
107.202	7.231	108.003	18.58		122.066	2.422	125.148	65.62
107.245	7.17	108.046	18.61		122.131	2.411	125.217	65.64
107.288	7.19	108.09	18.64		122.197	2.349	125.286	65.64
107.33	7.16	108.134	18.67		122.262	2.376	125.355	65.63
107.373	7.204	108.177	18.7		122.327	2.334	125.424	65.63
107.416	7.144	108.221	18.72		122.392	0.568	125.493	65.61
107.459	7.16	108.265	18.75		122.457	0.555	125.562	65.61
107.501	7.123	108.308	18.79		122.523	0.9	125.631	65.56
107.544	7.102	108.352	18.81		122.588	4.548	125.7	65.55
107.587	7.101	108.396	18.84		122.653	4.124	125.769	65.52
107.629	7.132	108.439	18.87		122.718	3.462	125.838	65.5
107.672	7.111	108.483	18.9		122.784	3.255	125.907	65.48
107.715	7.143	108.527	18.94		122.849	3.043	125.976	65.46
107.757	7.161	108.57	18.96		122.914	2.942	126.045	65.44
107.8	7.145	108.614	18.99		122.979	3.007	126.114	65.42
107.843	7.13	108.658	19.02		123.045	3.068	126.183	65.39
107.885	7.168	108.701	19.05		123.11	2.935	126.252	65.37
107.928	7.189	108.745	19.08		123.175	2.834	126.321	65.35
107.971	7.157	108.788	19.11		123.24	2.623	126.39	65.32
108.013	7.107	108.832	19.14		123.306	2.547	126.459	65.29
108.056	7.121	108.876	19.16		123.371	2.432	126.528	65.27
108.099	7.181	108.919	19.19		123.436	2.34	126.597	65.25
108.141	7.116	108.963	19.22		123.501	2.315	126.666	65.23
108.184	7.134	109.007	19.25		123.567	2.275	126.735	65.21
108.227	7.12	109.05	19.27		123.632	2.218	126.804	65.19
108.269	7.132	109.094	19.3		123.697	2.211	126.873	65.17
108.312	7.133	109.138	19.33		123.762	2.156	126.942	65.13
108.355	7.146	109.181	19.35		123.827	2.153	127.011	65.11
108.397	7.163	109.225	19.38		123.893	2.16	127.08	65.08
108.44	7.2	109.269	19.41		123.958	2.179	127.149	65.06
108.483	7.154	109.312	19.44		124.023	2.153	127.218	65.03
108.525	7.161	109.356	19.46		124.088	2.159	127.287	65.01
108.568	7.149	109.4	19.49		124.154	2.146	127.356	64.98
108.611	7.208	109.443	19.52		124.219	2.101	127.425	64.95
108.653	7.185	109.487	19.55		124.284	2.109	127.494	64.92
108.696	7.204	109.53	19.57		124.349	2.048	127.563	64.9
108.739	7.207	109.574	19.6		124.415	2.085	127.632	64.84
108.781	7.22	109.618	19.62		124.48	2.122	127.701	64.81
108.824	7.221	109.661	19.65		124.545	2.062	127.77	64.8
108.867	7.271	109.705	19.67		124.61	2.084	127.839	64.73
108.909	7.288	109.749	19.71		124.676	2.108	127.908	64.76
108.952	7.292	109.792	19.73		124.741	2.099	127.977	64.73
108.995	7.324	109.836	19.75		124.806	2.088	128.046	64.69
109.037	7.324	109.88	19.78		124.871	2.095	128.115	64.7
109.08	7.357	109.923	19.8		124.936	2.085	128.184	64.66
109.123	7.341	109.967	19.83		125.002	2.04	128.253	64.57
109.165	7.402	110.011	19.85		125.067	2.066
109.208	7.4	110.054	19.88		125.132	2.077
109.251	7.442	110.098	19.91		125.197	2.072
109.293	7.408	110.142	19.93		125.263	2.031
109.336	7.46	110.185	19.98		125.328	2.11
109.379	7.463	110.229	20.02		125.393	2.061
109.421	7.466	110.273	20.05		125.458	2.043
109.464	7.488	110.316	20.07		125.524	2.045
109.507	7.476	110.36	20.09		125.589	2.031
109.549	7.54	110.403	20.11		125.654	2.074
109.592	7.567	110.447	20.13		125.719	2.055
109.635	7.529	110.491	20.15		125.785	2.034
109.678	7.492	110.534	20.17		125.85	2.003
109.72	7.535	110.578	20.2		125.915	1.98
109.763	7.551	110.622	20.21		125.98	2.032
109.806	7.505	110.665	20.23		126.045	1.96
109.848	7.452	110.709	20.25		126.111	1.993
109.891	7.469	110.753	20.27		126.176	1.951
109.934	7.522	110.796	20.28		126.241	1.971
109.976	7.513	110.84	20.3		126.306	1.938
110.019	7.569	110.884	20.32		126.372	1.953
110.062	7.871	110.927	20.34		126.437	1.938
110.104	7.698	110.971	20.35		126.502	1.893
110.147	7.45	111.015	20.36		126.567	1.946
110.19	7.455	111.058	20.38		126.633	1.891
110.232	7.438	111.102	20.39		126.698	1.895
110.275	7.392	111.146	20.4		126.763	1.915
110.318	7.324	111.189	20.42		126.828	1.849
110.36	7.303	111.233	20.43		126.894	1.905
110.403	7.297	111.276	20.45		126.959	1.921
110.446	7.236	111.32	20.46		127.024	1.864
110.488	7.228	111.364	20.47		127.089	1.822
110.531	7.231	111.407	20.49		127.154	1.857
110.574	7.245	111.451	20.5		127.22	1.914
110.616	7.17	111.495	20.51		127.285	1.837
110.659	7.141	111.538	20.53		127.35	1.839
110.702	7.14	111.582	20.54		127.415	1.811
110.744	7.1	111.626	20.56		127.481	1.834
110.787	7.162	111.669	20.57		127.546	1.838
110.83	7.03	111.713	20.59		127.611	1.804
110.872	7.007	111.757	20.6		127.676	1.794
110.915	6.996	111.8	20.61		127.742	1.81
110.958	6.969	111.844	20.63		127.807	1.824
111	6.944	111.888	20.64		127.872	1.815
111.043	6.922	111.931	20.66		127.937	1.751
111.086	6.927	111.975	20.67		128.003	1.797
111.128	6.918	112.018	20.69		128.068	1.748
111.171	6.876	112.062	20.7		128.133	1.737
111.214	6.896	112.106	20.72		128.198	1.779
111.256	6.855	112.149	20.73		128.263	1.698
111.299	6.885	112.193	20.75
111.342	6.859	112.237	20.77
111.384	6.859	112.28	20.78
111.427	6.929	112.324	20.8
111.47	6.862	112.368	20.82
111.512	6.828
111.555	6.876
111.598	6.82
111.64	6.861
111.683	6.904
111.726	6.918
111.768	6.943
111.811	6.968
111.854	6.967
111.897	6.97
111.939	6.976
111.982	6.988
112.025	7.009
112.067	7.039
112.11	7.041
112.153	7.092
112.195	7.1
112.238	7.142
112.281	7.124
112.323	7.686
112.366	7.178
